# Supplementary material for: Global Prevalence and Drivers of Dental Students’ COVID-19 Vaccine Hesitancy
Source: MDPI journal article supplement (doi:10.3390/vaccines9060566), 2021-05-29
Supplement: s1 [file s1]

**Table 1: Sample size of participating countries**

| Country                                  | Target Population | Sample Size |
|------------------------------------------|-------------------|-------------|
| the Republic of Albania                  | 746               | 254         |
| Canada                                   | 1200              | 300         |
| the Republic of Croatia                  | 1000              | 278         |
| the Republic of Ecuador                  | 5000              | 357         |
| the Republic of Estonia                  | 132               | 98          |
| the Republic of Indonesia                | 15000             | 375         |
| the Islamic Republic of Iran             | 8000              | 367         |
| the Republic of Iraq                     | 2436              | 332         |
| the Republic of Italy                    | 5500              | 359         |
| the Republic of Latvia                   | 530               | 223         |
| the Lebanese Republic                    | 900               | 269         |
| the Republic of Lithuania                | 807               | 260         |
| Malaysia                                 | 3645              | 348         |
| the Federal Democratic Republic of Nepal | 200               | 132         |
| the Islamic Republic of Pakistan         | 14800             | 374         |
| the State of Palestine                   | 3640              | 347         |
| the Portuguese Republic                  | 3000              | 341         |
| the Russian Federation                   | 60000             | 382         |
| the Republic of the Sudan                | 9000              | 368         |
| the Republic of Tunisia                  | 1200              | 291         |
| the Republic of Turkey                   | 29208             | 379         |
| the United States of America             | 26000             | 382         |

**Table 2: Questionnaire of Dental Students' COVID-19 Vaccine Hesitancy**

| 1. Demographic Data |                                                                                                                                                                                                                                                                              |
|---------------------|------------------------------------------------------------------------------------------------------------------------------------------------------------------------------------------------------------------------------------------------------------------------------|
| I. Gender           | <ul style="list-style-type: none"> <li>• Female</li> <li>• Male</li> <li>• Non-binary</li> <li>• Prefer not to say</li> </ul>                                                                                                                                                |
| II. Age             | <ul style="list-style-type: none"> <li>• Dropdown menu of numbers (18-40)</li> </ul>                                                                                                                                                                                         |
| III. Academic Level | <ul style="list-style-type: none"> <li>• 1<sup>st</sup> Year</li> <li>• 2<sup>nd</sup> Year</li> <li>• 3<sup>rd</sup> Year</li> <li>• 4<sup>th</sup> Year</li> <li>• 5<sup>th</sup> Year</li> <li>• 6<sup>th</sup> Year</li> <li>• Intern</li> <li>• Postgraduate</li> </ul> |
| IV. Country         | <ul style="list-style-type: none"> <li>• Albania</li> <li>• Burkina Faso</li> <li>• Canada</li> </ul>                                                                                                                                                                        |

|                                                                                       |                                                                                                                                                                                                                                                                                                                                                                                                                                                                                       |
|---------------------------------------------------------------------------------------|---------------------------------------------------------------------------------------------------------------------------------------------------------------------------------------------------------------------------------------------------------------------------------------------------------------------------------------------------------------------------------------------------------------------------------------------------------------------------------------|
|                                                                                       | <ul style="list-style-type: none"> <li>• Croatia</li> <li>• Ecuador</li> <li>• Estonia</li> <li>• Germany</li> <li>• Indonesia</li> <li>• Iran</li> <li>• Iraq</li> <li>• Italy</li> <li>• Latvia</li> <li>• Lebanon</li> <li>• Lithuania</li> <li>• Malaysia</li> <li>• Nepal</li> <li>• Nigeria</li> <li>• Pakistan</li> <li>• Palestine</li> <li>• Portugal</li> <li>• Russia</li> <li>• Sudan</li> <li>• Tunisia</li> <li>• Turkey</li> <li>• United States of America</li> </ul> |
| <b>2. COVID-19-related Experience</b>                                                 |                                                                                                                                                                                                                                                                                                                                                                                                                                                                                       |
| <b>V.</b> I had been infected by SARS-CoV-2                                           | <ul style="list-style-type: none"> <li>• Yes</li> <li>• No</li> </ul>                                                                                                                                                                                                                                                                                                                                                                                                                 |
| <b>VI.</b> I had been caring for someone with COVID-19 infection                      | <ul style="list-style-type: none"> <li>• Yes</li> <li>• No</li> </ul>                                                                                                                                                                                                                                                                                                                                                                                                                 |
| <b>VII.</b> I personally know someone who had died from COVID-19 infection            | <ul style="list-style-type: none"> <li>• Yes</li> <li>• No</li> </ul>                                                                                                                                                                                                                                                                                                                                                                                                                 |
| <b>VIII.</b> I personally know someone who had COVID-19 infection                     | <ul style="list-style-type: none"> <li>• Yes</li> <li>• No</li> </ul>                                                                                                                                                                                                                                                                                                                                                                                                                 |
| <b>3. Willingness to take COVID-19 Vaccine</b>                                        |                                                                                                                                                                                                                                                                                                                                                                                                                                                                                       |
| <b>IX.</b> I am willing to take the COVID-19 vaccine once it becomes available to me. | <ul style="list-style-type: none"> <li>• Totally Disagree</li> <li>• Disagree</li> <li>• Not Sure</li> <li>• Agree</li> <li>• Totally Agree</li> </ul>                                                                                                                                                                                                                                                                                                                                |
| <b>4. Drivers of COVID-19 vaccine-related Attitude</b>                                |                                                                                                                                                                                                                                                                                                                                                                                                                                                                                       |
| <b>X.</b> Do reports you hear/read in the media/ on social media make                 | <ul style="list-style-type: none"> <li>• Yes</li> <li>• No</li> <li>• Not sure</li> </ul>                                                                                                                                                                                                                                                                                                                                                                                             |

|                                                                                                                                                                                                              |                                                                                           |
|--------------------------------------------------------------------------------------------------------------------------------------------------------------------------------------------------------------|-------------------------------------------------------------------------------------------|
| you re-consider the choice to take COVID-19 vaccine?                                                                                                                                                         |                                                                                           |
| <b>XI.</b> Do celebrities, religious or political leader influence your decision about getting vaccinated?                                                                                                   | <ul style="list-style-type: none"> <li>• Yes</li> <li>• No</li> <li>• Not sure</li> </ul> |
| <b>XII.</b> Do you know anyone who does not take a vaccine because of religious or cultural values?                                                                                                          | <ul style="list-style-type: none"> <li>• Yes</li> <li>• No</li> <li>• Not Sure</li> </ul> |
| <b>XIII.</b> If “Yes”, Do you agree or disagree with these persons?                                                                                                                                          | <ul style="list-style-type: none"> <li>• Yes</li> <li>• No</li> <li>• Not sure</li> </ul> |
| <b>XIV.</b> Do you trust that your government is making decisions in your best interest with respect to what vaccines are provided (e.g., your government purchases the highest quality vaccines available)? | <ul style="list-style-type: none"> <li>• Yes</li> <li>• No</li> <li>• Not sure</li> </ul> |
| <b>XV.</b> Do you trust pharmaceutical companies to provide credible data on COVID-19 vaccine safety and effectiveness vaccines?                                                                             | <ul style="list-style-type: none"> <li>• Yes</li> <li>• No</li> <li>• Not sure</li> </ul> |
| <b>XVI.</b> Do you think that there are better ways to prevent diseases than using COVID-19 vaccines (e.g., developing immunity by getting sick and recovered)?                                              | <ul style="list-style-type: none"> <li>• Yes</li> <li>• No</li> <li>• Not sure</li> </ul> |
| <b>XVII.</b> Do you feel you have enough information about COVID-19 vaccines and their safety?                                                                                                               | <ul style="list-style-type: none"> <li>• Yes</li> <li>• No</li> <li>• Not sure</li> </ul> |
| <b>XVIII.</b> Do you think that the benefits of COVID-19 vaccines outweigh their reported side effects / adverse reactions?                                                                                  | <ul style="list-style-type: none"> <li>• Yes</li> <li>• No</li> <li>• Not sure</li> </ul> |
| <b>XIX.</b> In general, when a new vaccine is introduced, are you inclined to consent on your vaccination?                                                                                                   | <ul style="list-style-type: none"> <li>• Yes</li> <li>• No</li> <li>• Not sure</li> </ul> |
| <b>XX.</b> Do you feel confident that the health centre or doctor's office will have the COVID-19                                                                                                            | <ul style="list-style-type: none"> <li>• Yes</li> <li>• No</li> <li>• Not sure</li> </ul> |

|                                       |  |
|---------------------------------------|--|
| vaccine you need, when you need them? |  |
|---------------------------------------|--|
